# Supplementary material
Source: Springer Nature journal article supplement (https://www.springermedizin.de/resource/supplementary/13089_2013_70_MOESM7_ESM.pdf/9675650)

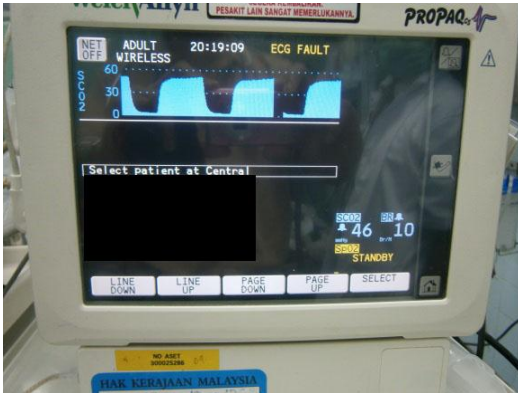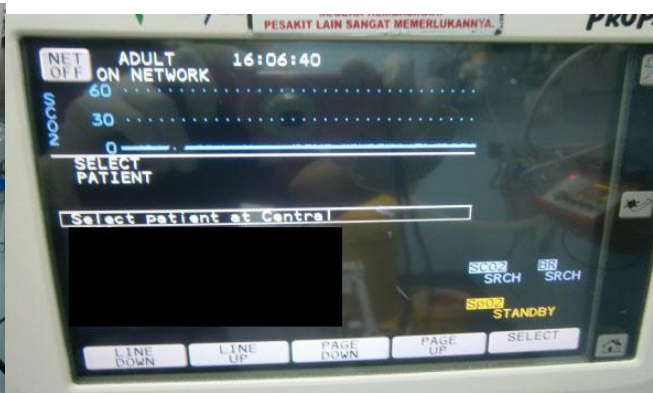

Supplement: MOESM7 [file 9675650]
